# Supplementary material for: TiO2nanotubes grown on graphene sheets as advanced anode materials for high rate lithium ion batteries
Source: Royal Society of Chemistry journal article supplement (doi:10.1039/c4ra05027d), 2014-07-31
Supplement: c4ra05027d1.pdf [file c4ra05027d1.pdf]

Supporting Information for

TiO<sub>2</sub> nanotubes grown on graphene sheets as advanced  
anode materials for high rate lithium ion batteries

Yufeng Tang,<sup>a</sup> Zhanqiang Liu,<sup>a</sup> Fuqiang Huang<sup>\*,a,b</sup> and Baofeng Wang<sup>c</sup>

<sup>a</sup> CAS Key Laboratory of Materials for Energy Conversion and State Key Laboratory of High Performance Ceramics and Superfine Microstructure, Shanghai Institute of Ceramics, Chinese Academy of Sciences, Shanghai 200050, China; <sup>b</sup> State Key Laboratory of Rare Earth Materials Chemistry and Applications, College of Chemistry & Molecular Engineering, Peking University, Beijing 100871, China; <sup>c</sup> College of Environmental and Chemical Engineering, Shanghai University of Electric Power, Shanghai 200090, China

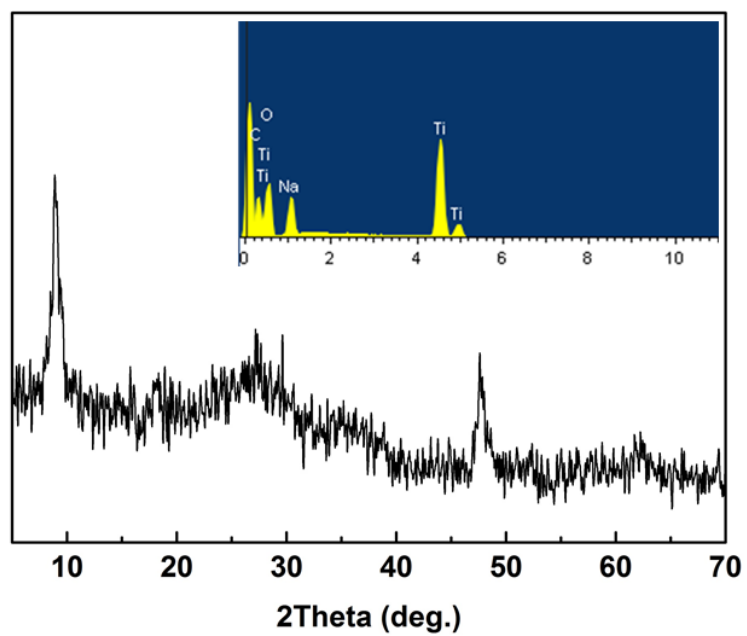

**Figure S1.** XRD pattern and EDS of graphene oxide sheets supported titanate nanotubes

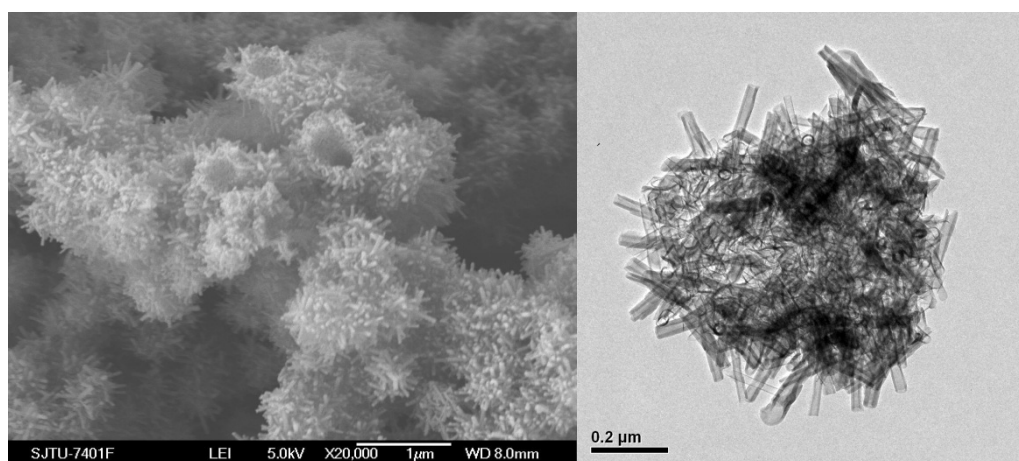

**Figure S2.** Aggregation of  $\text{TiO}_2$  nanotubes without graphene

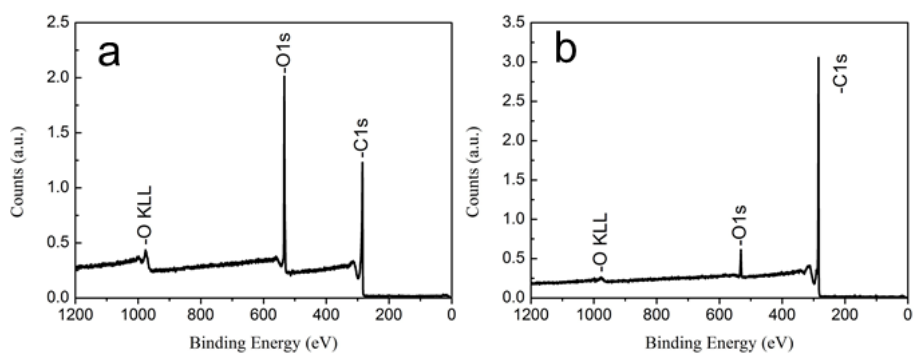

**Figure S3.** XPS Survey scan of (a) GO and (b) reduced GO after heat-treatment at 400 °C in H<sub>2</sub>/Ar.

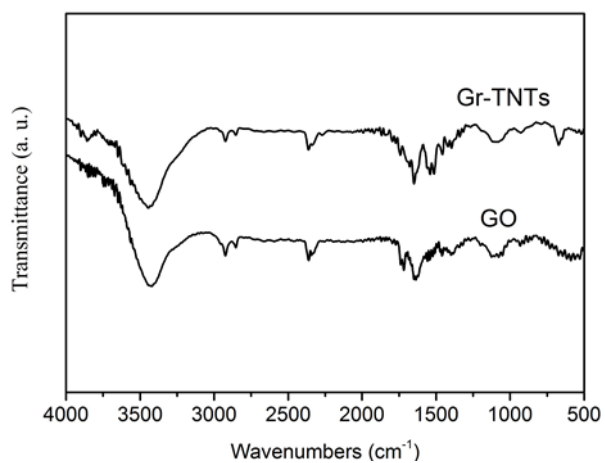

**Figure S4.** FT-IR spectra of GO and Gr-TNTs samples.

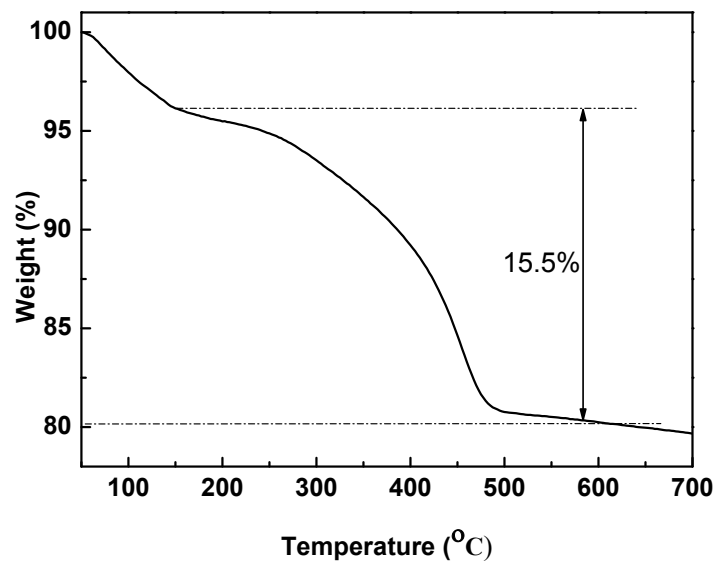

**Figure S5.** Thermogravimetric analysis of Gr-TNTs nanocomposites. The weight loss of ~4.5% below 100 °C should be due to the evaporation of the absorbed moisture contents, which is common for materials with large surface area.
